# Supplementary material
Source: publisher figshare collection journal article supplement (https://acs.figshare.com/ndownloader/files/17869115)
Supplement: Supplementary file 1 [file 17869115]

## Supporting Information

*for*

### A Total Synthesis of (±)-Leuconodines D and E

Jing Zhang,<sup>a,b</sup> and Fu-She Han<sup>\*,a</sup>

<sup>a</sup> CAS Key Lab of High-Performances Synthetic Rubber and its Composite Materials, Changchun  
Institute of Applied Chemistry, Chinese Academy of Sciences, Changchun 130022, China

<sup>b</sup> The University of Chinese Academy of Sciences, Beijing 100864, China

Email: [fshan@ciac.ac.cn](mailto:fshan@ciac.ac.cn)

#### Table of Contents

|                                                                                                  |     |
|--------------------------------------------------------------------------------------------------|-----|
| 1. Comparison of the spectra data of naturally occurring and synthetic leuconodines D and E..... | S2  |
| 2. X-Ray data of compounds 26 and (±)-leuconodine D.....                                         | S6  |
| 3. Copies of NMR spectra.....                                                                    | S8  |
| 4. References.....                                                                               | S21 |

# 1. Comparison of spectroscopic data of naturally occurring and synthetic leuconodines D (1) and E (2)

**Table S1.** Comparison of the  $^1\text{H}$  NMR data of naturally occurring<sup>1</sup> and synthetic leuconodine E (2)

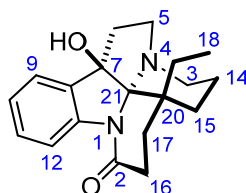

**Leuconodine E (2)**

| Position | $\delta_{\text{H}}$ in ppm ( $J$ in Hz) |                                |                         |
|----------|-----------------------------------------|--------------------------------|-------------------------|
|          | Natural product <sup>a</sup>            | Synthetic product <sup>b</sup> | $\Delta_{(\text{S-N})}$ |
| OH       | -                                       | 2.42 (s, 1H)                   |                         |
| 3        | 2.96 m                                  | 2.96 m                         | 0                       |
| 5a       | 2.70 m                                  | 2.70 m                         | 0                       |
| 5b       | 2.87 m                                  | 2.87 m                         | 0                       |
| 6a       | 2.08 (dd, 11, 6)                        | 2.08 (dd, 12.4, 6.5)           | 0                       |
| 6b       | 2.74 m                                  | 2.74 m                         | 0                       |
| 9        | 7.27 (d, 8)                             | 7.27 (d, 8)                    | 0                       |
| 10       | 7.08 (td, 8, 1.5)                       | 7.07 (td, 7.5, 1)              | -0.01                   |
| 11       | 7.23 (td, 8, 1.5)                       | 7.23 (td, 7.8, 1.4)            | 0                       |
| 12       | 8.11 (d, 8)                             | 8.10 (d, 8)                    | -0.01                   |
| 14a      | 1.70 m                                  | 1.70 m                         | 0                       |
| 14b      | 1.80 m                                  | 1.80 m                         | 0                       |
| 15       | 1.74 m                                  | 1.74 m                         | 0                       |
| 16a      | 2.31 (dt, 14, 3)                        | 2.26 (ddd, 14.8, 5.5, 2.0)     | 0.05                    |
| 16b      | 3.53 (ddd, 14, 12, 10)                  | 3.49 (ddd, 14.7, 12.9, 8.5)    | -0.04                   |
| 17       | 1.77m                                   | 1.77m                          | 0                       |
| 18       | 0.74 (t, 7.6)                           | 0.73 (t, 7.4)                  | -0.01                   |
| 19a      | 1.14 (dq, 14, 7.6)                      | 1.17 (dq, 14.6, 7.5)           | 0.03                    |
| 19b      | 1.74 m                                  | 1.74 m                         | 0                       |

<sup>a</sup>  $^1\text{H}$  NMR spectra were obtained at 400 MHz in  $\text{CDCl}_3$ .

<sup>b</sup>  $^1\text{H}$  NMR spectra were obtained at 500 MHz in  $\text{CDCl}_3$ .

**Table S2.** Comparison of the  $^{13}\text{C}$ -NMR data of naturally occurring<sup>1</sup> and synthetic leuconodine E (2)

| Position | $\delta_c$ in ppm            |                                |                  |
|----------|------------------------------|--------------------------------|------------------|
|          | Natural product <sup>a</sup> | Synthetic product <sup>b</sup> | $\Delta_{(S-N)}$ |
| 2        | 173.2                        | 173.3                          | 0.1              |
| 3        | 49.5                         | 49.6                           | 0.1              |
| 5        | 49.6                         | 49.8                           | 0.2              |
| 6        | 44.4                         | 44.4                           | 0                |
| 7        | 91.8                         | 91.9                           | 0.1              |
| 8        | 135.6                        | 135.8                          | 0.2              |
| 9        | 120.6                        | 120.8                          | 0.2              |
| 10       | 123.8                        | 124.0                          | 0.2              |
| 11       | 128.9                        | 129.0                          | 0.1              |
| 12       | 115.2                        | 115.5                          | 0.3              |
| 13       | 141.2                        | 141.3                          | 0.1              |
| 14       | 20.5                         | 20.6                           | 0.1              |
| 15       | 29.6                         | 29.8                           | 0.2              |
| 16       | 31.9                         | 32.1                           | 0.2              |
| 17       | 32.3                         | 32.4                           | 0.1              |
| 18       | 7.4                          | 7.6                            | 0.2              |
| 19       | 28.9                         | 29.0                           | 0.1              |
| 20       | 41.5                         | 41.6                           | 0.1              |
| 21       | 95.3                         | 95.5                           | 0.2              |

<sup>a</sup>  $^{13}\text{C}$  NMR spectra were obtained at 100 MHz in  $\text{CDCl}_3$ .

<sup>b</sup>  $^{13}\text{C}$  NMR spectra were obtained at 125 MHz in  $\text{CDCl}_3$ .

**Table S3.** Comparison of the  $^1\text{H}$  NMR data of naturally occurring,<sup>1</sup> and Dai's<sup>2</sup> and our synthetic leuconodine D (**1**)

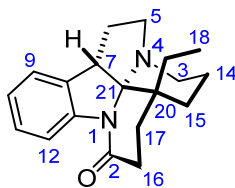

**Leuconodine D (1)**

| Position | $\delta_{\text{H}}$ in ppm ( $J$ in Hz) |                                       |                                       |
|----------|-----------------------------------------|---------------------------------------|---------------------------------------|
|          | Natural product isolated <sup>a</sup>   | Synthetic product By Dai <sup>b</sup> | Synthetic product By Han <sup>c</sup> |
| 3a       | 2.52 (td, 13, 3.5)                      | 2.55 (td, 12, 3.5)                    | 2.55 (td, 12, 3.5)                    |
| 3b       | 3.03(d, 13)                             | 2.98 m                                | 2.98 m                                |
| 5a       | 2.72 (dd, 13, 6.5)                      | 2.69 (dd, 12.5, 7)                    | 2.69 (dd, 12.5, 7)                    |
| 5b       | 2.93 (td, 13, 6.5)                      | 2.91 (td, 12.5, 6)                    | 2.91 (td, 12.5, 6)                    |
| 6a       | 1.50 (dd, 11, 6)                        | 1.48 (dd, 12, 6.5)                    | 1.48 (dd, 12, 6.5)                    |
| 6b       | 2.60 m                                  | 2.59 m                                | 2.59 m                                |
| 7        | 3.77 (d, 9.5)                           | 3.75 (d, 9.5)                         | 3.75 (d, 9.5)                         |
| 9        | 7.13 (d, 7.3)                           | 7.12 (d, 7.5)                         | 7.12 (d, 7.5)                         |
| 10       | 7.00 (td, 7.3, 1)                       | 6.99 (td, 7.5, 1)                     | 6.99 (td, 7.5, 1)                     |
| 11       | 7.16 (td, 7.3, 1)                       | 7.16 (td, 7.5, 1)                     | 7.16 (td, 7.5, 1)                     |
| 12       | 8.11 (d, 7.3)                           | 8.10 (d, 8)                           | 8.10 (d, 8)                           |
| 14a      | 1.61 m                                  | 1.58 m                                | 1.59 m                                |
| 14b      | 1.82 m                                  | 1.80 m                                | 1.81 m                                |
| 15a      | 1.21(td, 13, 3.5)                       | 1.18(td, 13.5, 3.5)                   | 1.19 (td, 13.5, 3.5)                  |
| 15b      | 1.79 m                                  | 1.76 m                                | 1.77 m                                |
| 16a      | 2.34 (ddd, 14, 5, 2.5)                  | 2.33 (ddd, 14, 5, 2.5)                | 2.33 (ddd, 14, 5, 2.5)                |
| 16b      | 3.59 (td, 14, 8)                        | 3.59 m                                | 3.59 m                                |
| 17a      | 1.70 m                                  | 1.71 m                                | 1.71 m                                |
| 17b      | 1.73 m                                  | 1.74 m                                | 1.74 m                                |
| 18       | 0.73 (t, 7.3)                           | 0.72 (t, 7.5)                         | 0.72 (t, 7.5)                         |
| 19a      | 1.07 (dq, 13, 7.3)                      | 1.06 (dq, 13.5, 7.5)                  | 1.07 (dq, 13.5, 7.5)                  |
| 19b      | 1.30 (dq, 13, 7.3)                      | 1.30 (dq, 13.5, 7.5)                  | 1.30 (dq, 13.5, 7.5)                  |

<sup>a</sup>  $^1\text{H}$  NMR spectra were obtained at 400 MHz in  $\text{CDCl}_3$ .

<sup>b</sup>  $^1\text{H}$  NMR spectra were obtained at 500 MHz in  $\text{CDCl}_3$ .

<sup>c</sup>  $^1\text{H}$  NMR spectra were obtained at 500 MHz in  $\text{CDCl}_3$ .

**Table S4.** Comparison of the  $^{13}\text{C}$  NMR data of naturally occurring,<sup>1</sup> and Dai's<sup>2</sup> and our synthetic leuconodine D (**1**)

| Position | $\delta_{\text{H}}$ in ppm               |                                       |                                       |
|----------|------------------------------------------|---------------------------------------|---------------------------------------|
|          | Natural product <sup>a</sup><br>ioslated | Synthetic product <sup>b</sup><br>Dai | Synthetic product <sup>c</sup><br>Han |
| 2        | 172.6                                    | 172.9                                 | 172.9                                 |
| 3        | 50.9                                     | 51.0                                  | 51.0                                  |
| 5        | 52.2                                     | 52.4                                  | 52.5                                  |
| 6        | 33.3                                     | 33.5                                  | 33.5                                  |
| 7        | 47.0                                     | 47.1                                  | 47.1                                  |
| 8        | 133.7                                    | 134.1                                 | 134.1                                 |
| 9        | 127.5                                    | 127.6                                 | 127.6                                 |
| 10       | 123.5                                    | 123.7                                 | 123.7                                 |
| 11       | 123.5                                    | 123.6                                 | 123.6                                 |
| 12       | 114.5                                    | 114.5                                 | 114.5                                 |
| 13       | 143.0                                    | 143.1                                 | 143.2                                 |
| 14       | 19.9                                     | 20.2                                  | 20.2                                  |
| 15       | 32.0                                     | 31.7                                  | 31.7                                  |
| 16       | 32.8                                     | 32.3                                  | 32.1                                  |
| 17       | 28.9                                     | 29.3                                  | 29.4                                  |
| 18       | 7.4                                      | 7.7                                   | 7.7                                   |
| 19       | 31.4                                     | 31.7                                  | 31.7                                  |
| 20       | 40.3                                     | 40.6                                  | 40.6                                  |
| 21       | 97.6                                     | 97.7                                  | 97.7                                  |

<sup>a</sup>  $^1\text{H}$  NMR spectra were obtained at 100 MHz in  $\text{CDCl}_3$ .

<sup>b</sup>  $^1\text{H}$  NMR spectra were obtained at 125 MHz in  $\text{CDCl}_3$ .

<sup>c</sup>  $^1\text{H}$  NMR spectra were obtained at 125 MHz in  $\text{CDCl}_3$ .

## 2. X-Ray data of compounds **26** and **2**

**Table S5.** Crystal data and structure refinement for **26** (CCDC 1880949)

The single crystal of compound **26** was obtained by slow diffusion of n-hexane into a CHCl<sub>3</sub> solution of **26** at room temperature. X-ray crystallographic analysis was performed on a Bruker D8 ADVANCE diffractometer with Mo-K $\alpha$  ( $\lambda$  = 0.71073 Å).

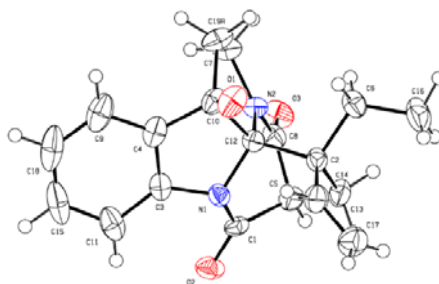

(50% probability)

|                                             |                                                                                         |
|---------------------------------------------|-----------------------------------------------------------------------------------------|
| formula                                     | C <sub>19</sub> H <sub>19</sub> N <sub>2</sub> O <sub>3</sub>                           |
| Formula weight                              | 323.36                                                                                  |
| Temperature/K                               | 120                                                                                     |
| Crystal system                              | orthorhombic                                                                            |
| Space group                                 | Pc2 <sub>1</sub> /n                                                                     |
| Unit cell dimensions                        | a= 7.4919 (5) Å alpha=90°<br>b= 13.2055 (9) Å beta= 90 °<br>c= 15.9971 (11) Å gamma=90° |
| Volume/Å <sup>3</sup>                       | 1582.66 (19)                                                                            |
| Z                                           | 4                                                                                       |
| ρ <sub>calc</sub> /cm <sup>3</sup>          | 1.358                                                                                   |
| μ/mm <sup>2</sup>                           | 0.093                                                                                   |
| F(000)                                      | 684.0                                                                                   |
| Crystal size/mm <sup>3</sup>                | 0.5 × 0.3 × 0.2                                                                         |
| Radiation                                   | MoK $\alpha$ ( $\lambda$ = 0.71073)                                                     |
| 2 $\theta$ range for data collection/°      | 5.092 to 52.768                                                                         |
| Index ranges                                | -9 ≤ h ≤ 9, -14 ≤ k ≤ 16, -19 ≤ l ≤ 19                                                  |
| Reflections collected                       | 8514                                                                                    |
| Independent reflections                     | 3084 [R <sub>int</sub> = 0.0298, R <sub>sigma</sub> = 0.0358]                           |
| Data/restraints/parameters                  | 3840/0/245                                                                              |
| Goodness-of-fit on F <sup>2</sup>           | 1.046                                                                                   |
| Final R indexes [I ≥ 2σ (I)]                | R <sub>1</sub> = 0.0399, wR <sub>2</sub> = 0.1013                                       |
| Final R indexes [all data]                  | R <sub>1</sub> = 0.0465, wR <sub>2</sub> = 0.1084                                       |
| Largest diff. peak/hole / e Å <sup>-3</sup> | 0.34/-0.18                                                                              |

**Table S6.** Crystal data and structure refinement for **2** (CCDC 1872048)

The single crystal of compound **2** was obtained by slow diffusion of n-hexane into a  $\text{CHCl}_3$  solution of **2** at room temperature. X-ray crystallographic analysis was performed on a Bruker D8 ADVANCE diffractometer with Mo-K $\alpha$  ( $\lambda = 0.71073 \text{ \AA}$ ).

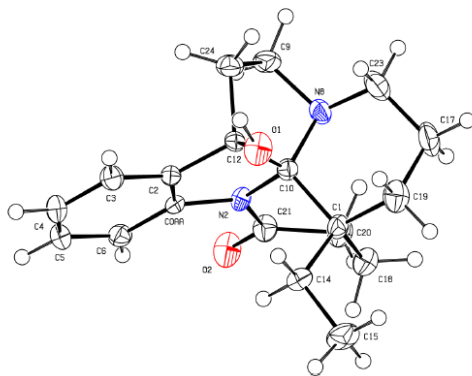

(50% probability)

|                                                |                                                                                                                                                         |
|------------------------------------------------|---------------------------------------------------------------------------------------------------------------------------------------------------------|
| formula                                        | $\text{C}_{19}\text{H}_{24}\text{N}_2\text{O}_2$                                                                                                        |
| Formula weight                                 | 312.18                                                                                                                                                  |
| Temperature/K                                  | 120                                                                                                                                                     |
| Crystal system                                 | orthorhombic                                                                                                                                            |
| Space group                                    | $P2_12_12_1$                                                                                                                                            |
| Unit cell dimensions                           | $a = 8.1530(6) \text{ \AA}$ $\alpha = 90^\circ$<br>$b = 10.6538(8) \text{ \AA}$ $\beta = 90^\circ$<br>$c = 18.3193(14) \text{ \AA}$ $\gamma = 90^\circ$ |
| Volume/ $\text{\AA}^3$                         | 1591.2(2)                                                                                                                                               |
| Z                                              | 32                                                                                                                                                      |
| $\rho_{\text{calc}}/\text{cm}^3$               | 1.308                                                                                                                                                   |
| $\mu/\text{mm}^{-1}$                           | 0.085                                                                                                                                                   |
| F(000)                                         | 676.0                                                                                                                                                   |
| Crystal size/ $\text{mm}^3$                    | $0.5 \times 0.4 \times 0.3$                                                                                                                             |
| Radiation                                      | MoK $\alpha$ ( $\lambda = 0.71073$ )                                                                                                                    |
| $2\theta$ range for data collection/ $^\circ$  | 4.422 to 52.762                                                                                                                                         |
| Index ranges                                   | $-10 \leq h \leq 9$ , $-13 \leq k \leq 12$ , $-19 \leq l \leq 22$                                                                                       |
| Reflections collected                          | 8958                                                                                                                                                    |
| Independent reflections                        | 3241 [ $R_{\text{int}} = 0.0290$ , $R_{\text{sigma}} = 0.0314$ ]                                                                                        |
| Data/restraints/parameters                     | 3241/0/211                                                                                                                                              |
| Goodness-of-fit on F2                          | 1.144                                                                                                                                                   |
| Final R indexes [ $I \geq 2\sigma(I)$ ]        | $R_1 = 0.1045$ , $wR_2 = 0.2425$                                                                                                                        |
| Final R indexes [all data]                     | $R_1 = 0.1082$ , $wR_2 = 0.2494$                                                                                                                        |
| Largest diff. peak/hole / $e \text{ \AA}^{-3}$ | 1.48/-0.43                                                                                                                                              |

### 3. Copies of NMR spectra of substrates and products

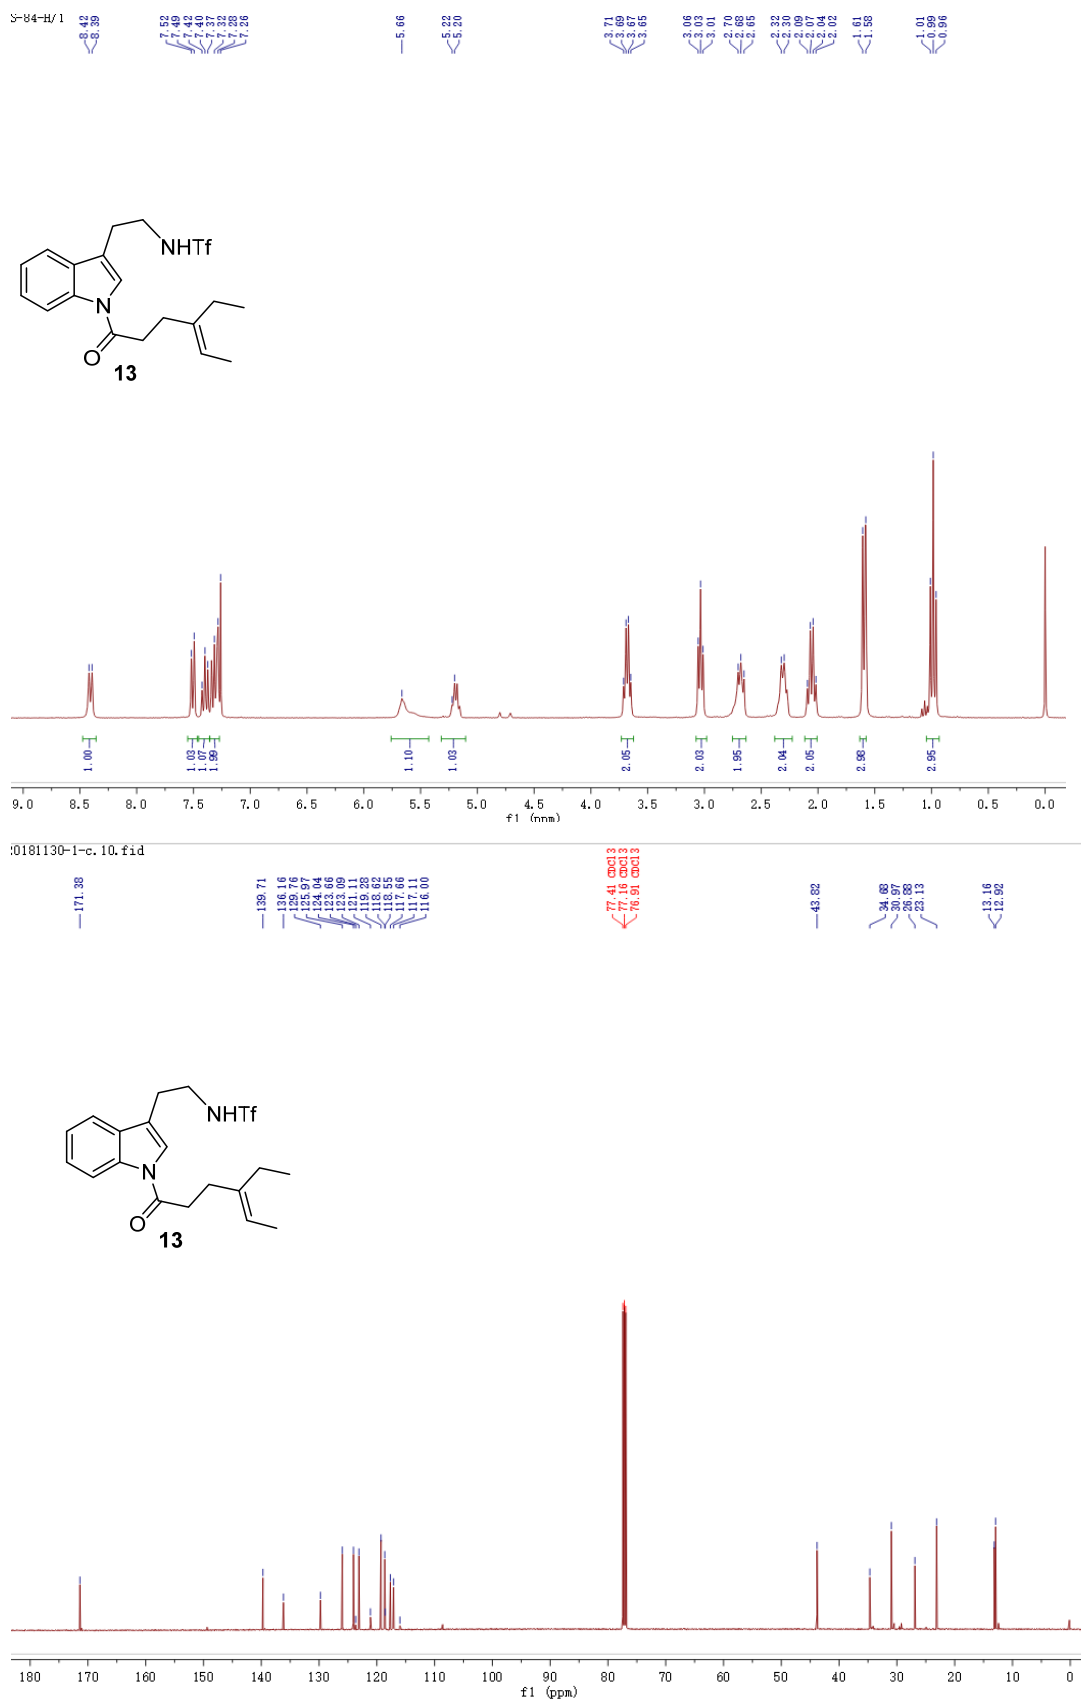

**Figure S1.** <sup>1</sup>H- (upper) and <sup>13</sup>C-NMR (lower) of compound **13** (see also ref. 3)



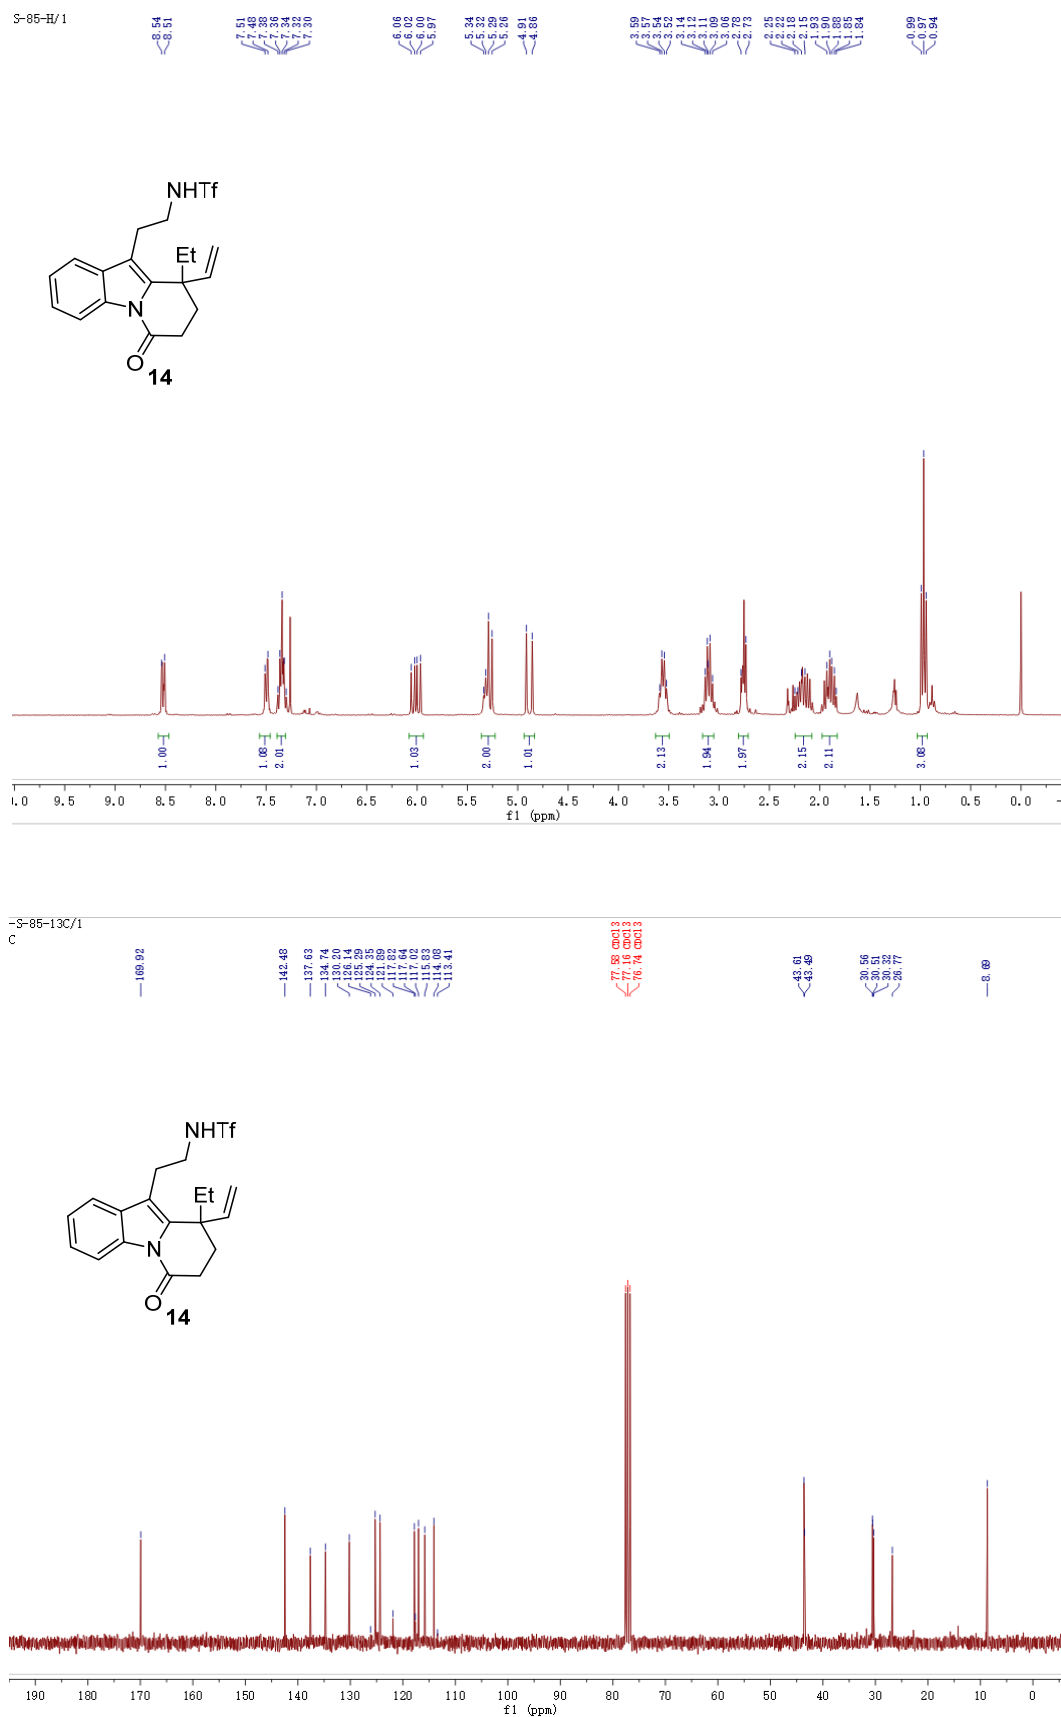

**Figure S2.** <sup>1</sup>H- (upper) and <sup>13</sup>C-NMR (lower) of compound **14** (see also ref. 3)

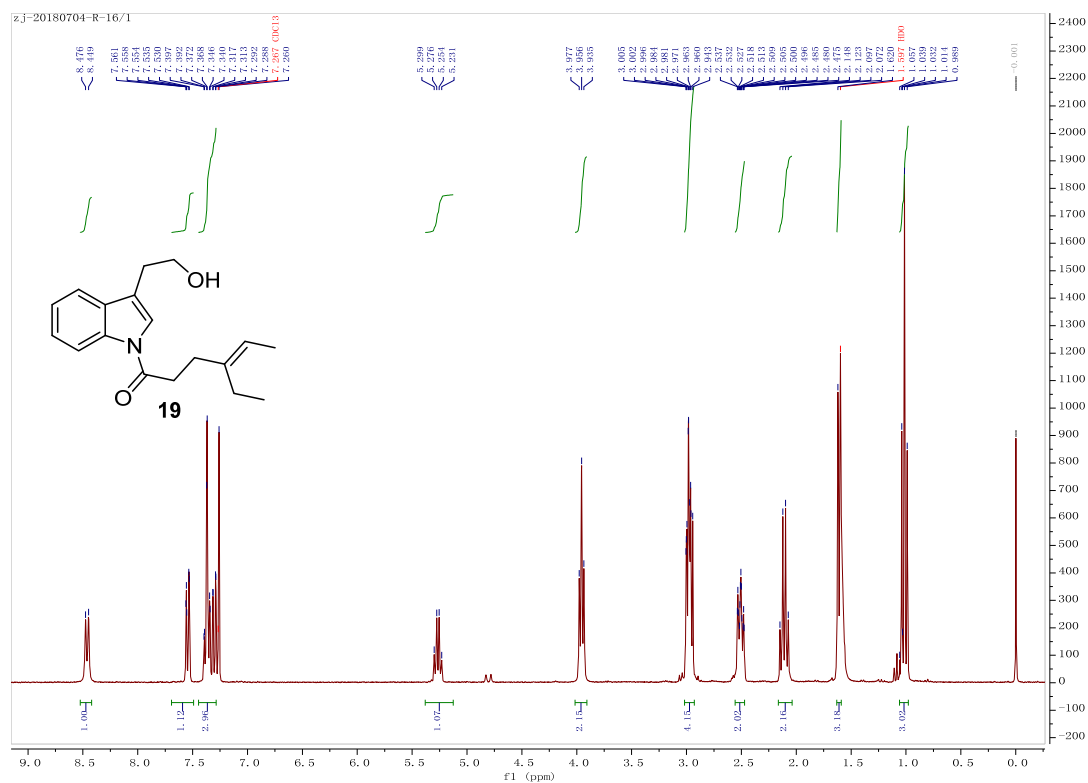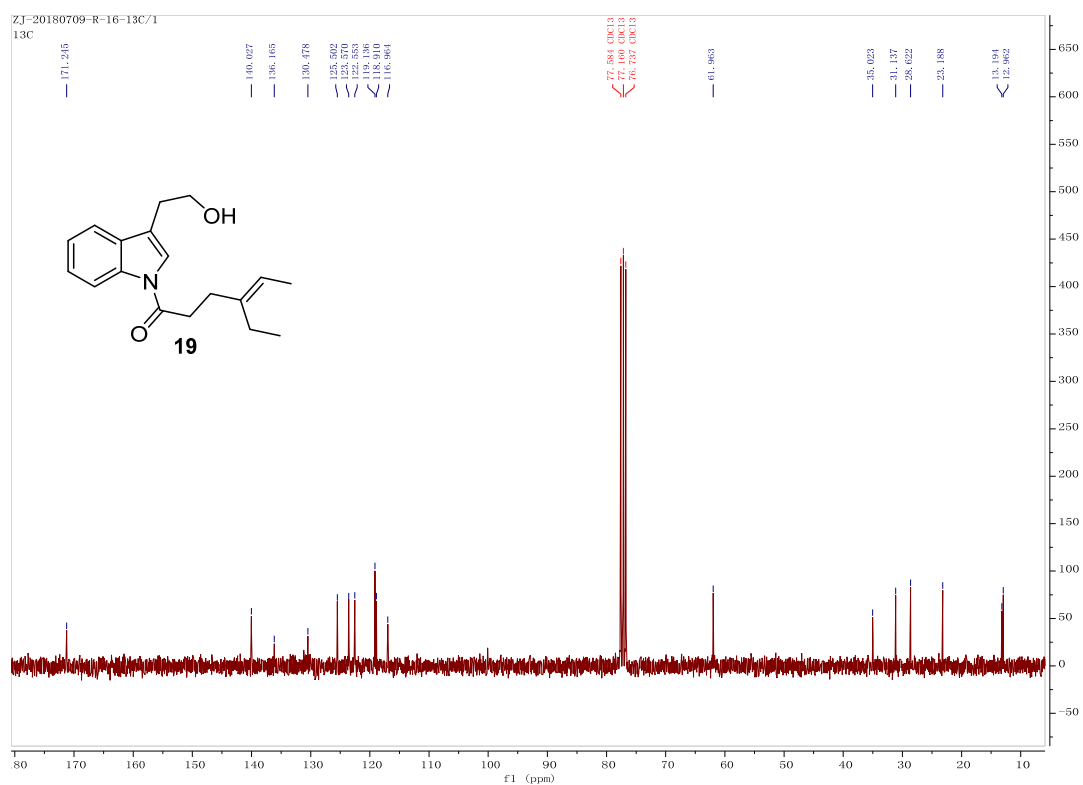

**Figure S3.**  $^1\text{H}$ - (upper) and  $^{13}\text{C}$ -NMR (lower) of compound **19** (see also ref. 3)



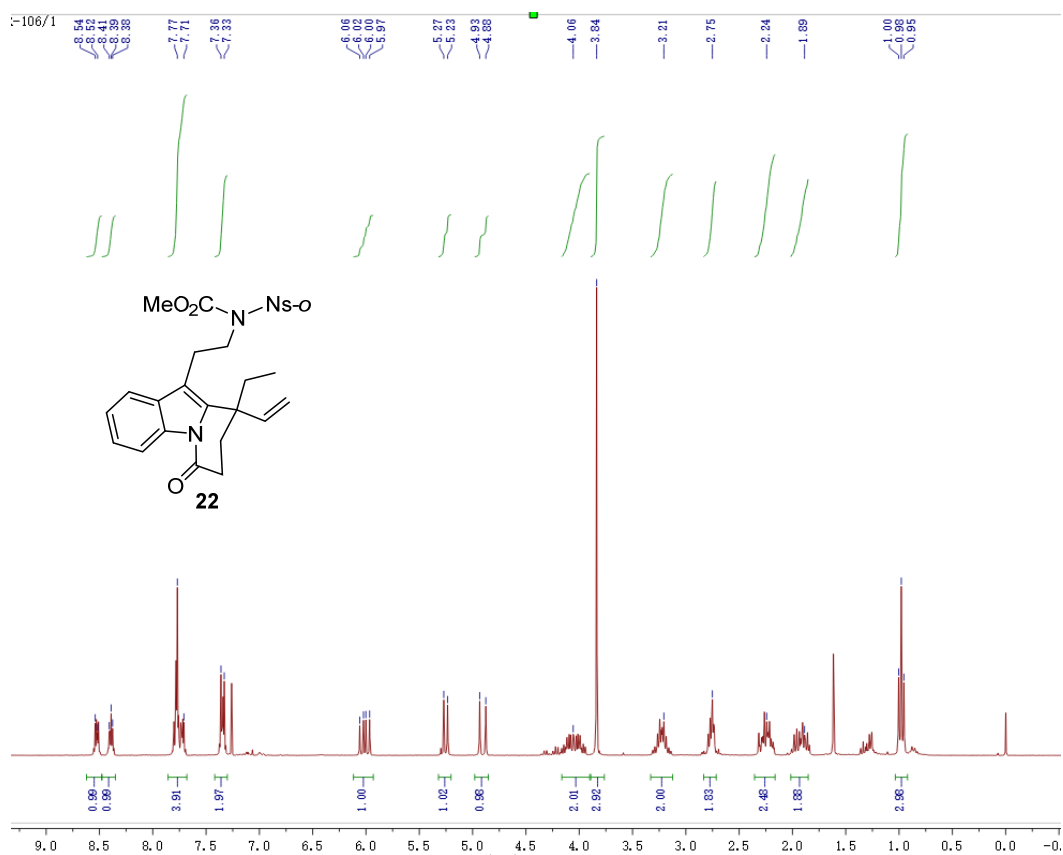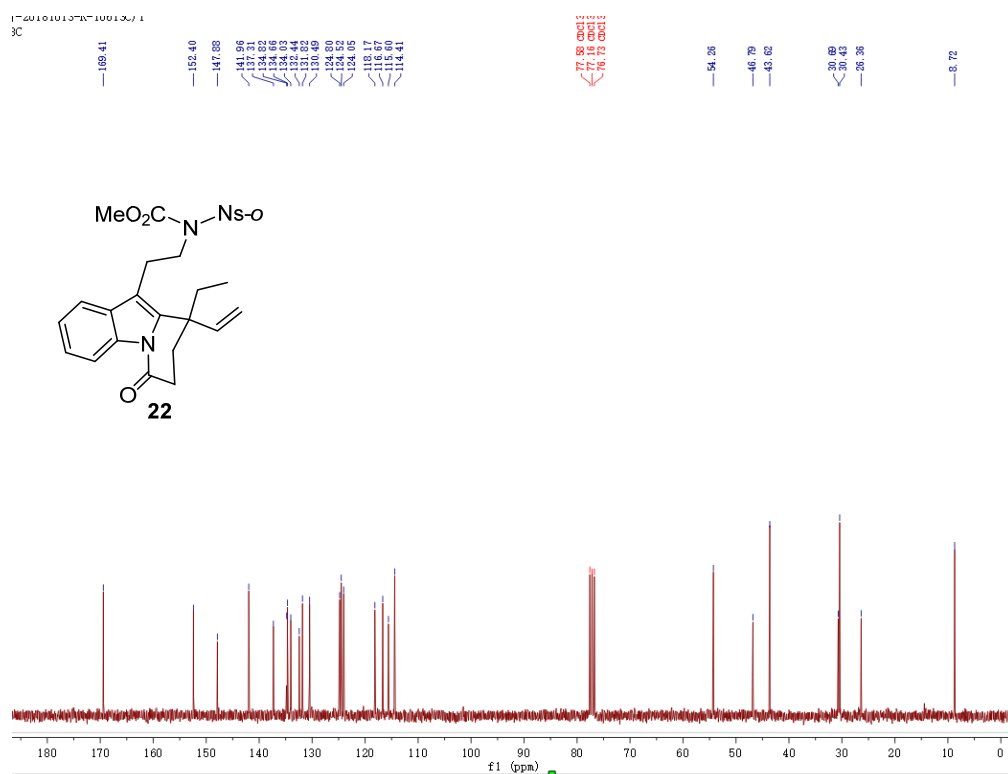

Figure S5. <sup>1</sup>H- (upper) and <sup>13</sup>C-NMR (lower) of compound **22**

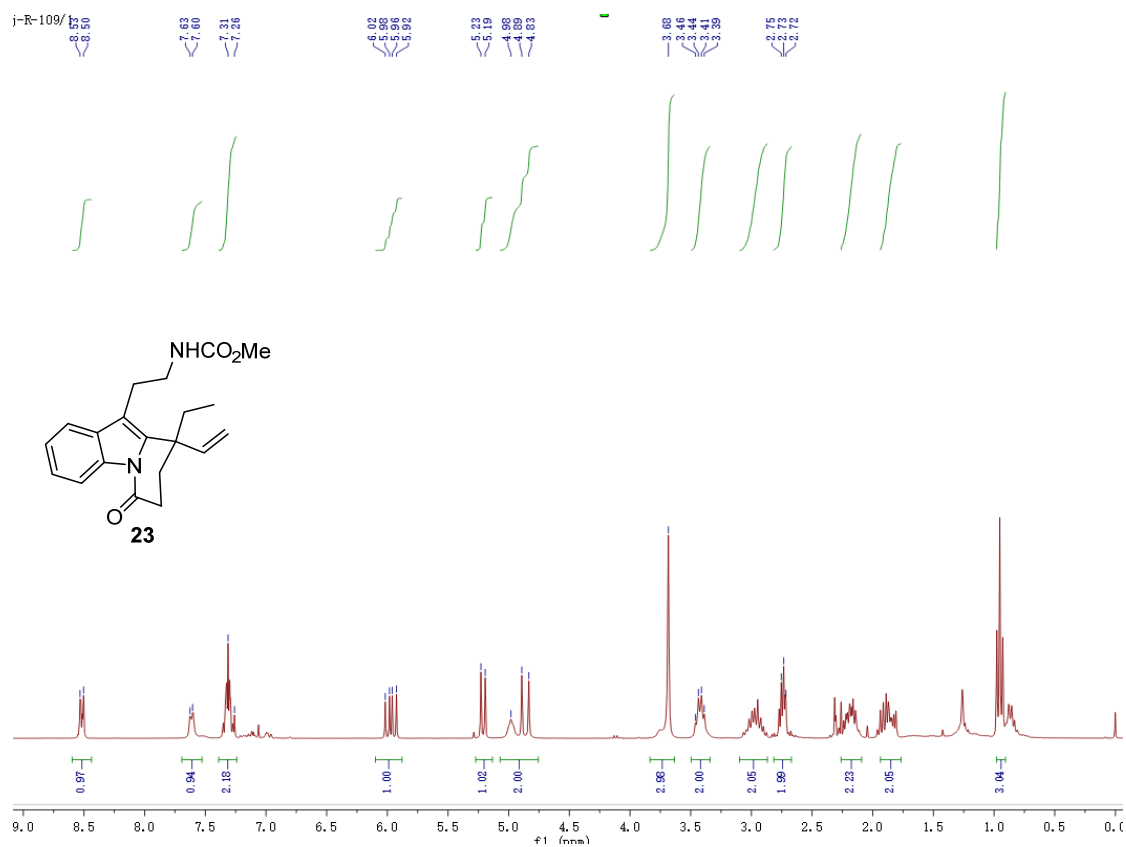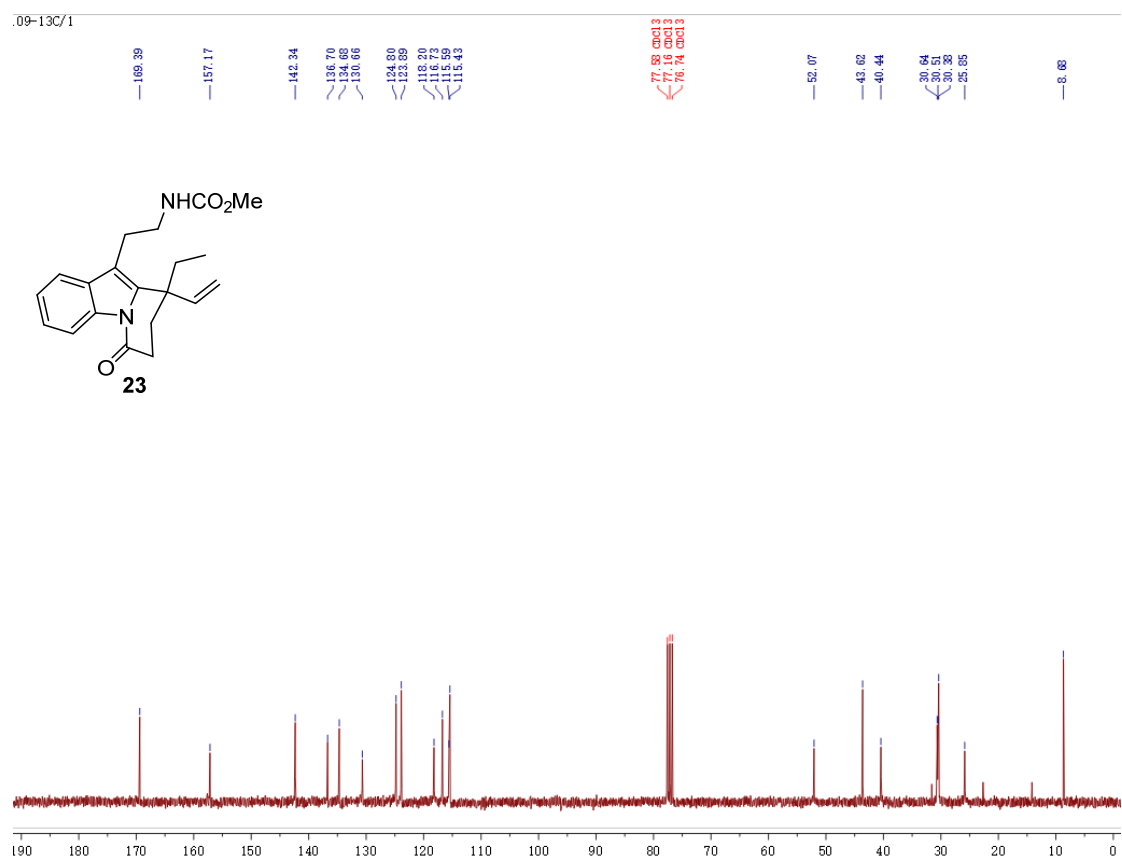

**Figure S6.** <sup>1</sup>H- (upper) and <sup>13</sup>C-NMR (lower) of compound **23**

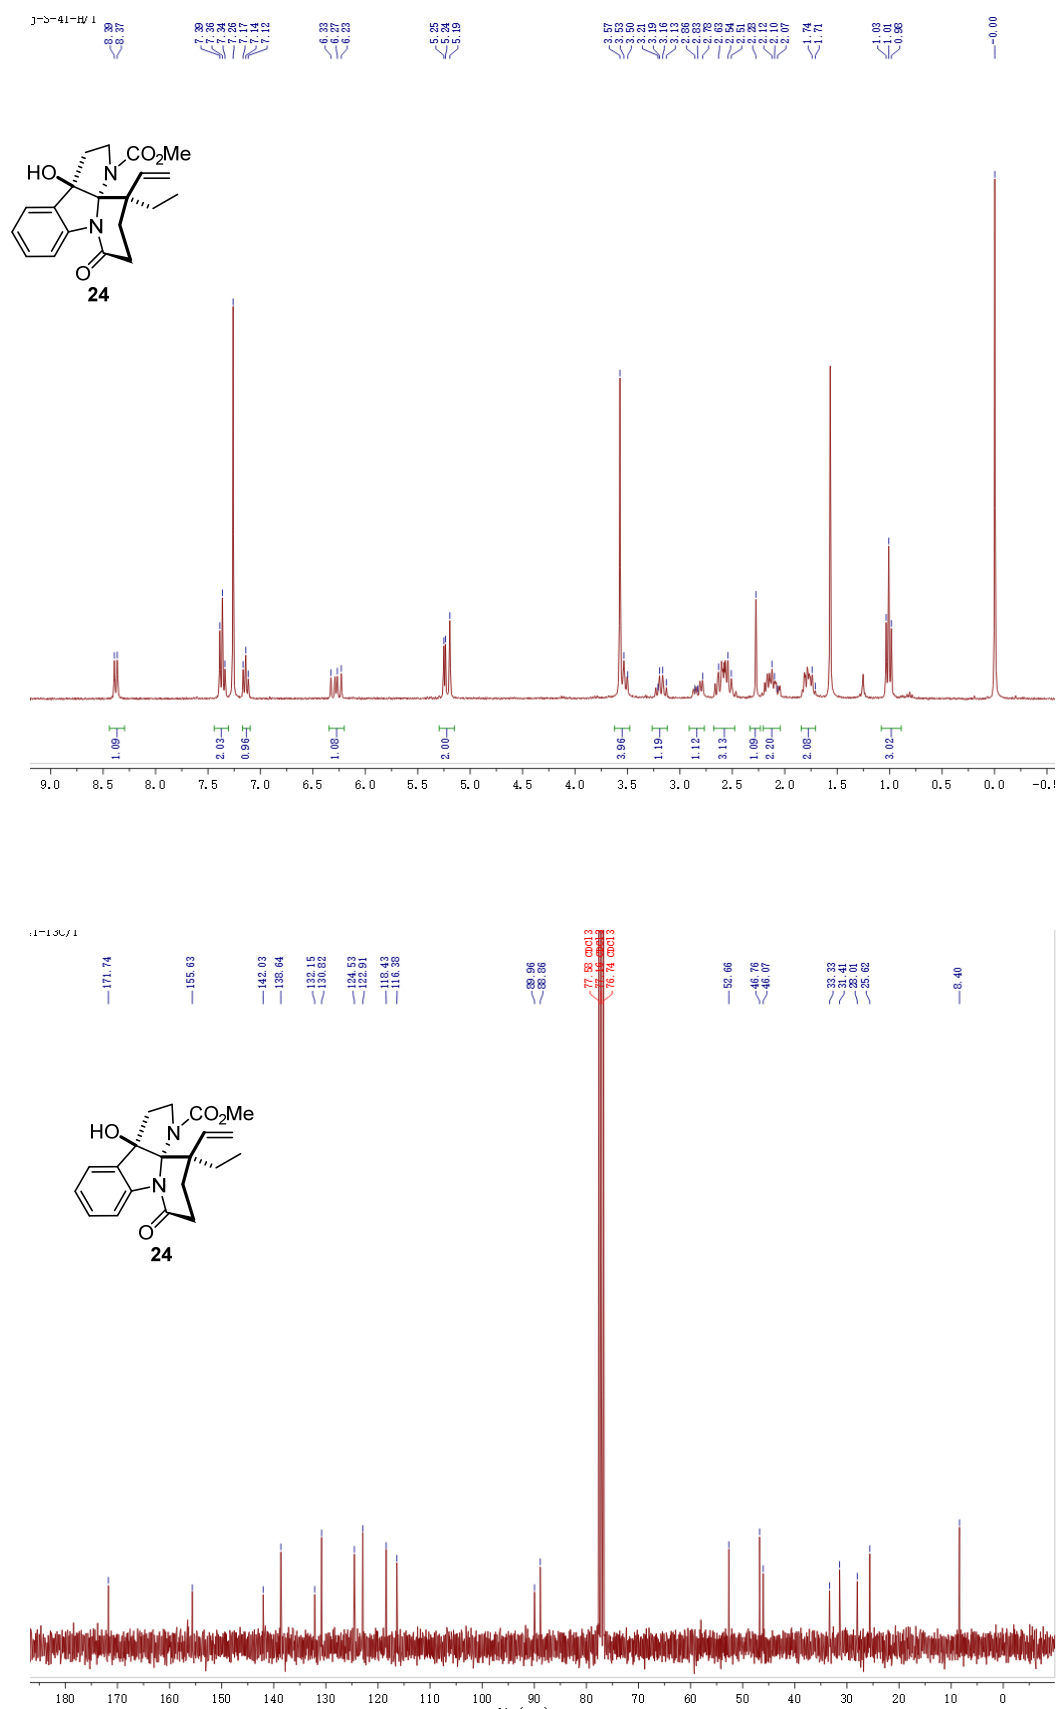

**Figure S7.** <sup>1</sup>H- (upper) and <sup>13</sup>C-NMR (lower) of compound **24**

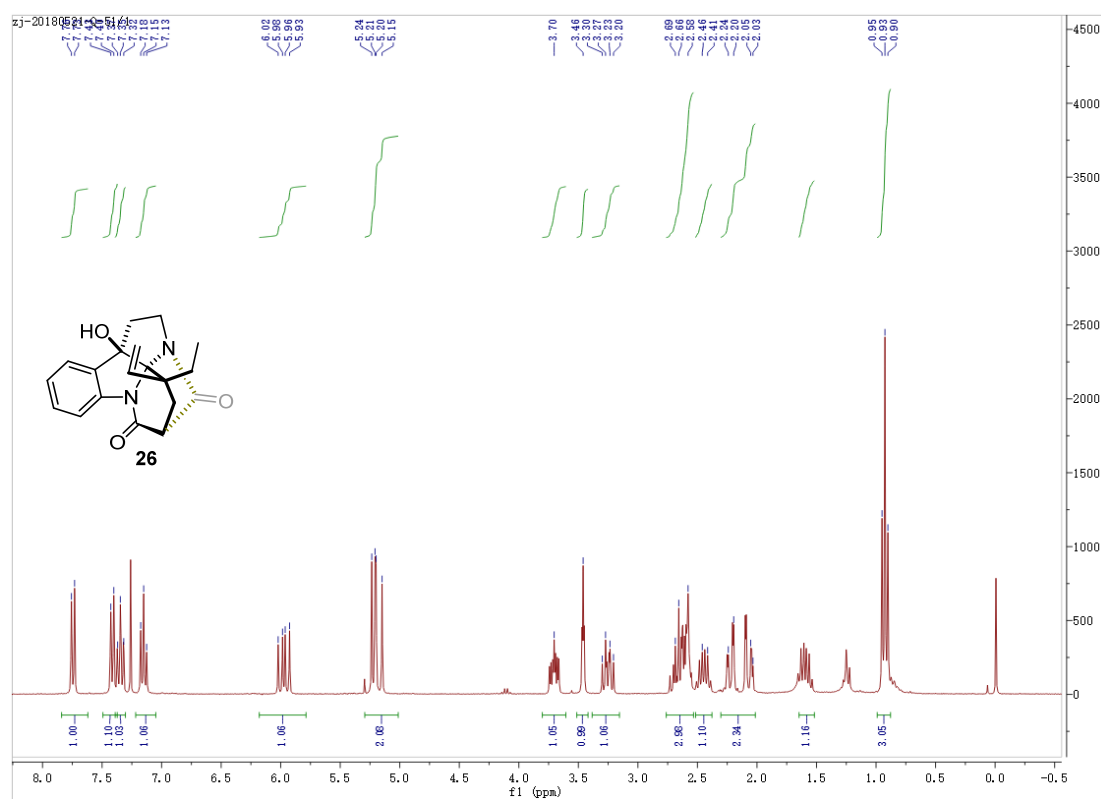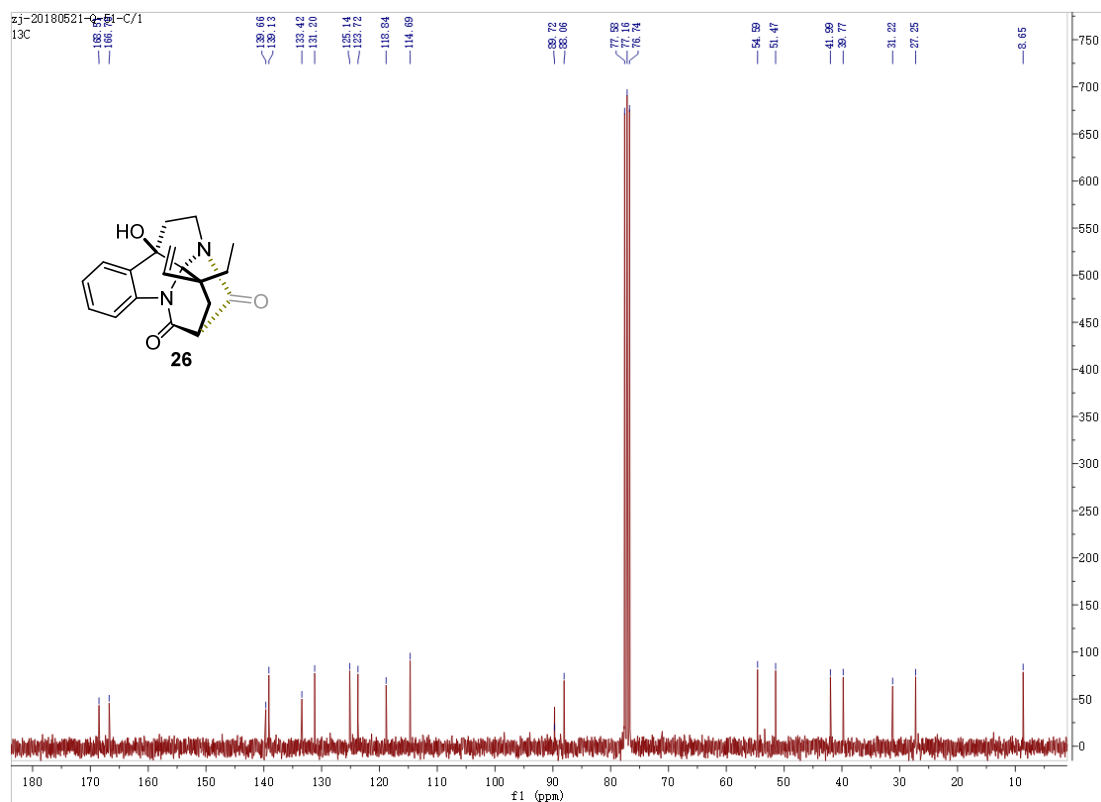

**Figure S8.** <sup>1</sup>H- (upper) and <sup>13</sup>C-NMR (lower) of compound **26**

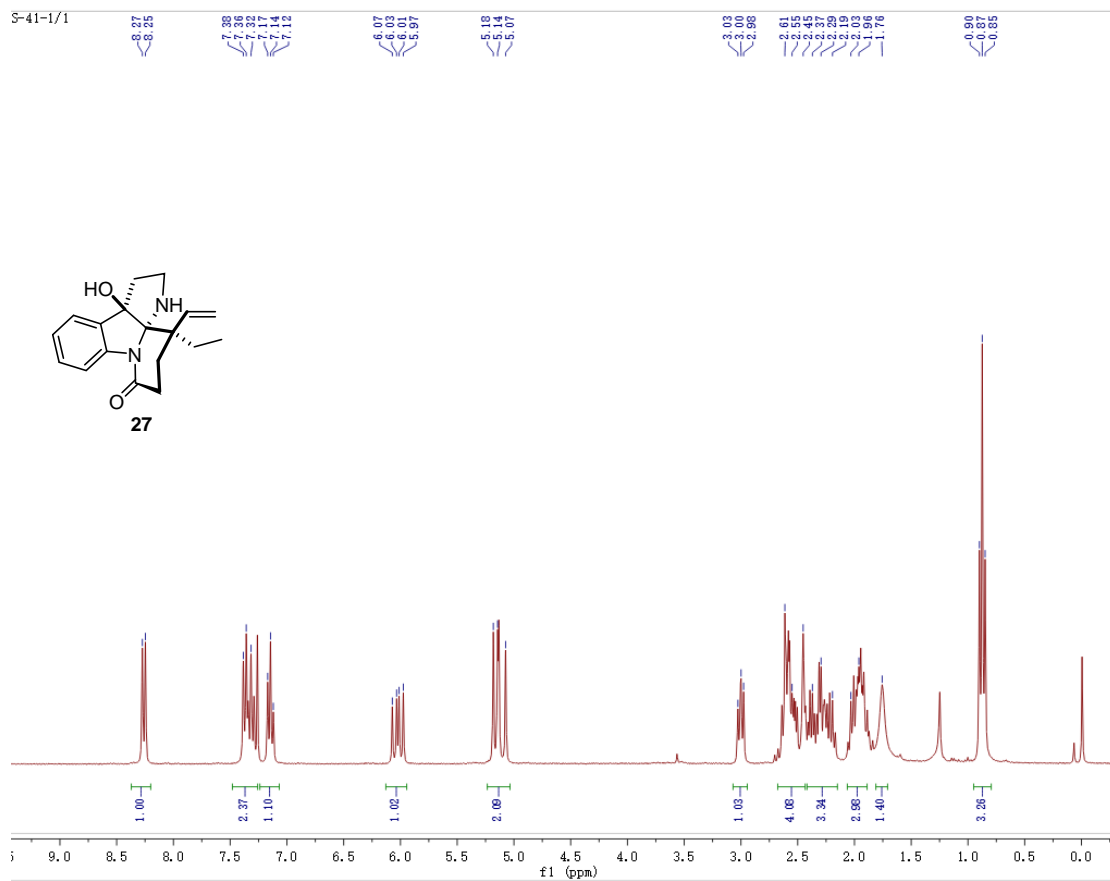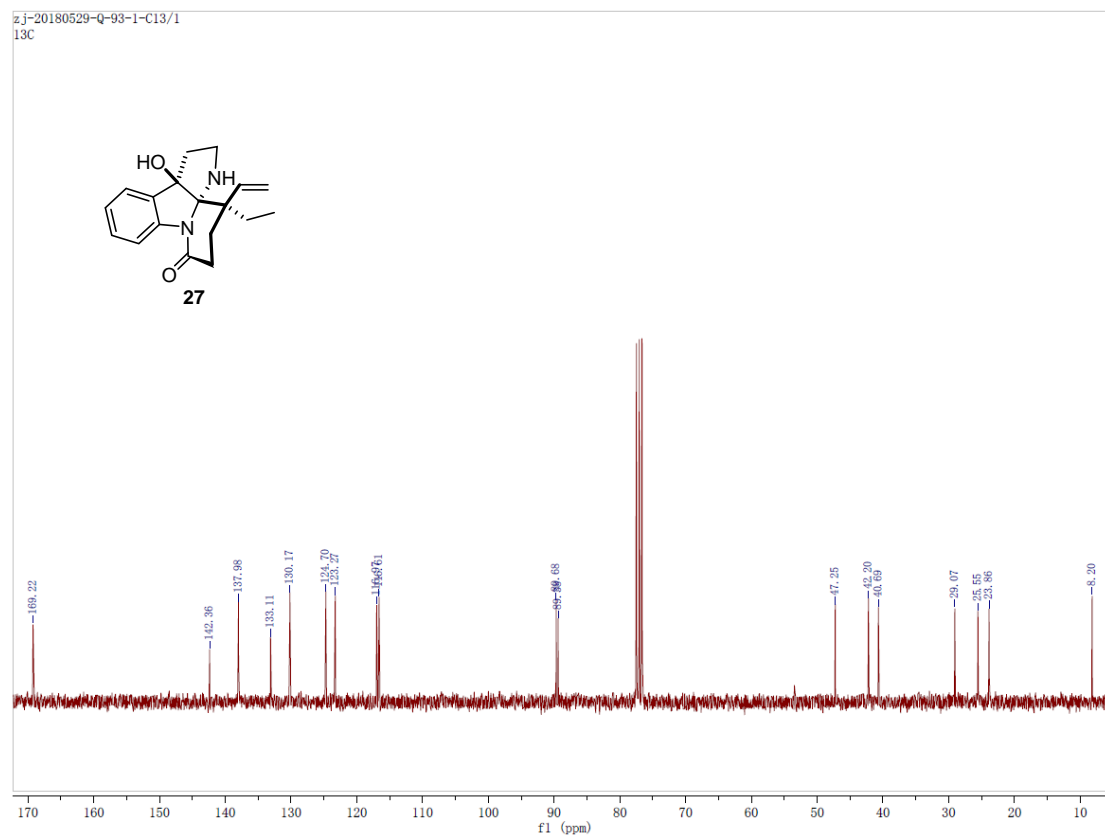

**Figure S9.** <sup>1</sup>H- (upper) and <sup>13</sup>C-NMR (lower) of compound **27**



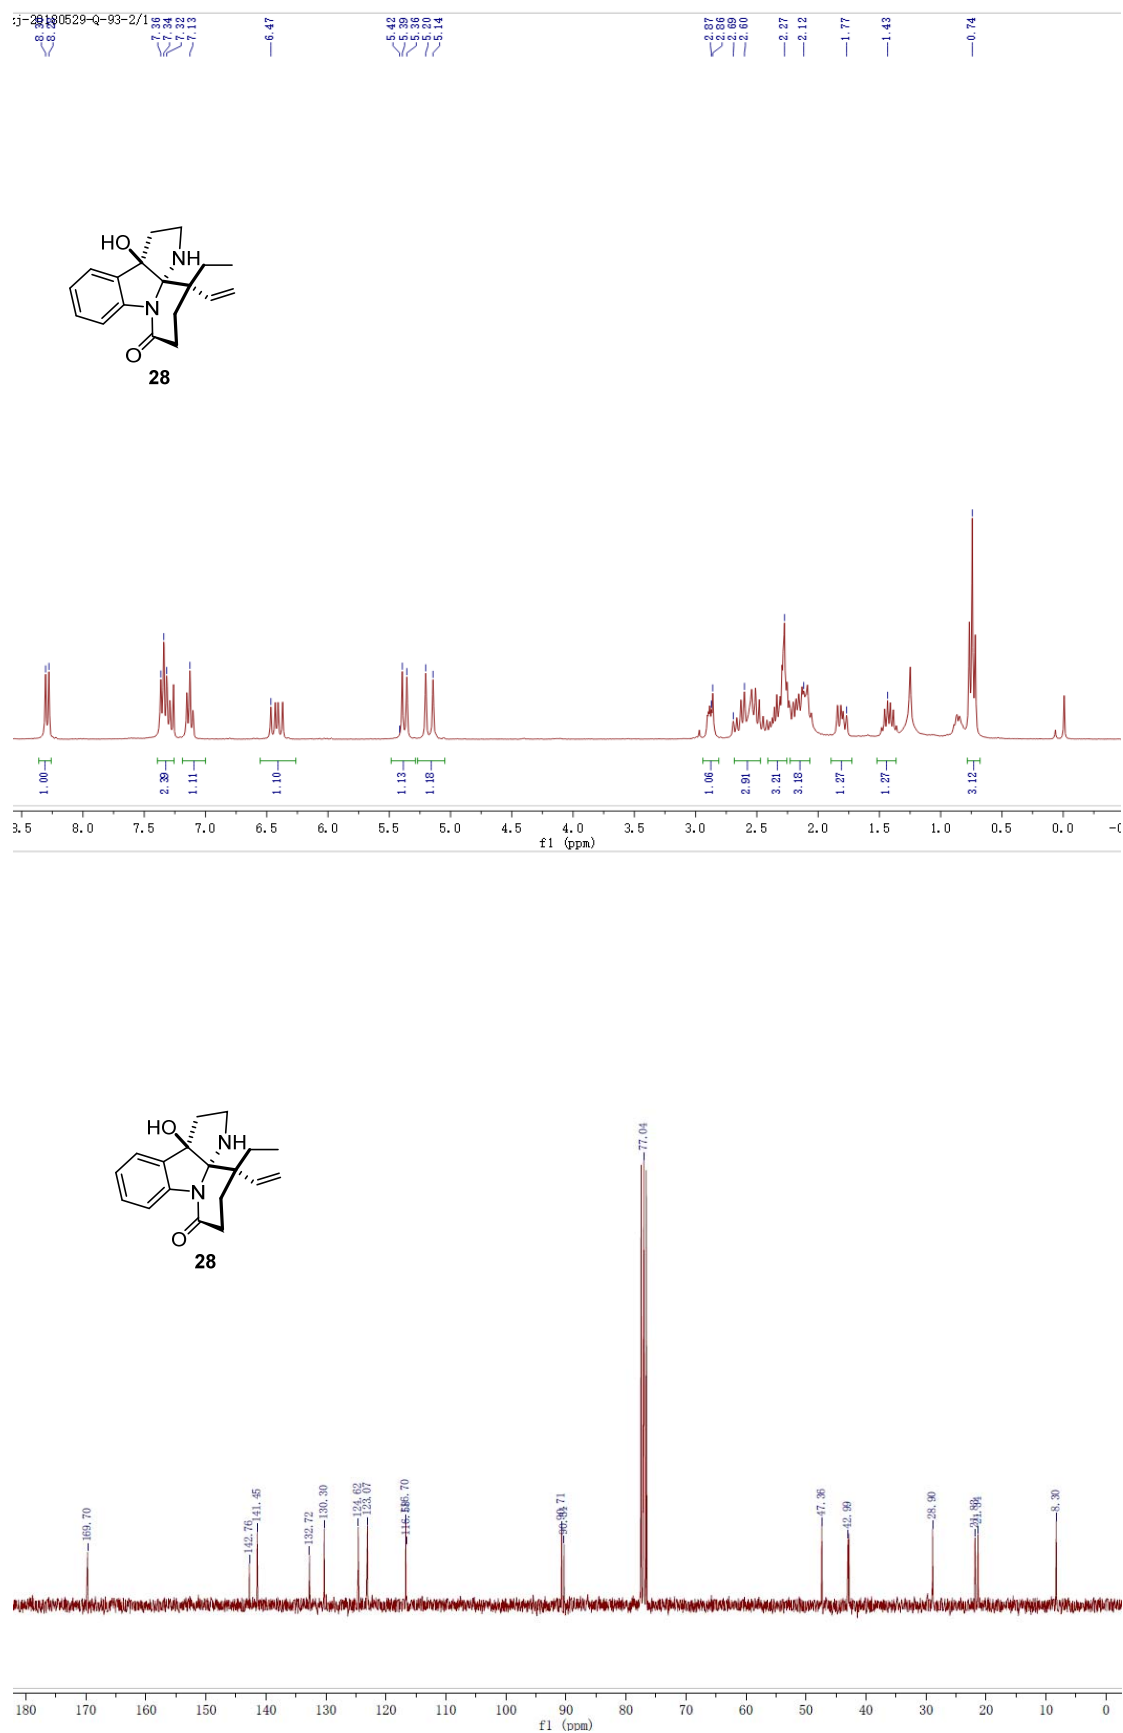

**Figure S10.**  $^1\text{H}$ - (upper) and  $^{13}\text{C}$ -NMR (lower) of compound **28**

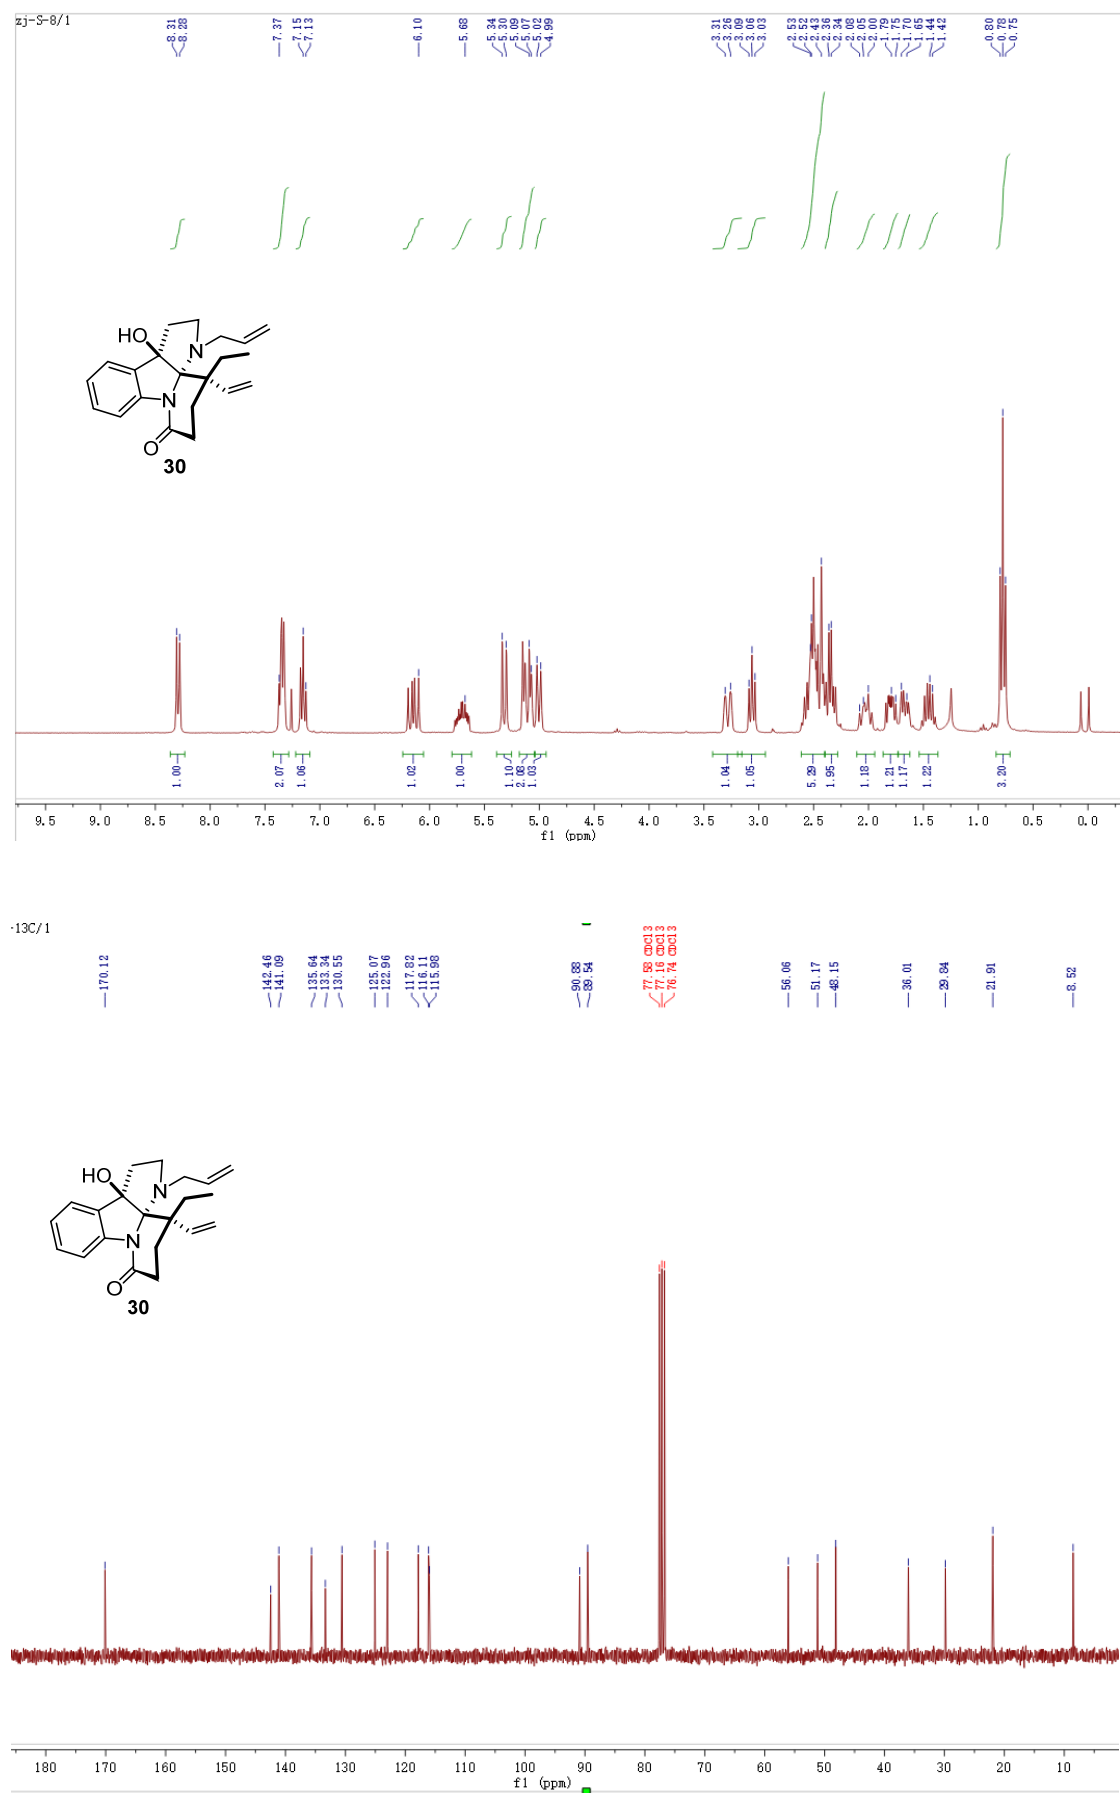

**Figure S11.** <sup>1</sup>H- (upper) and <sup>13</sup>C-NMR (lower) of compound **30**

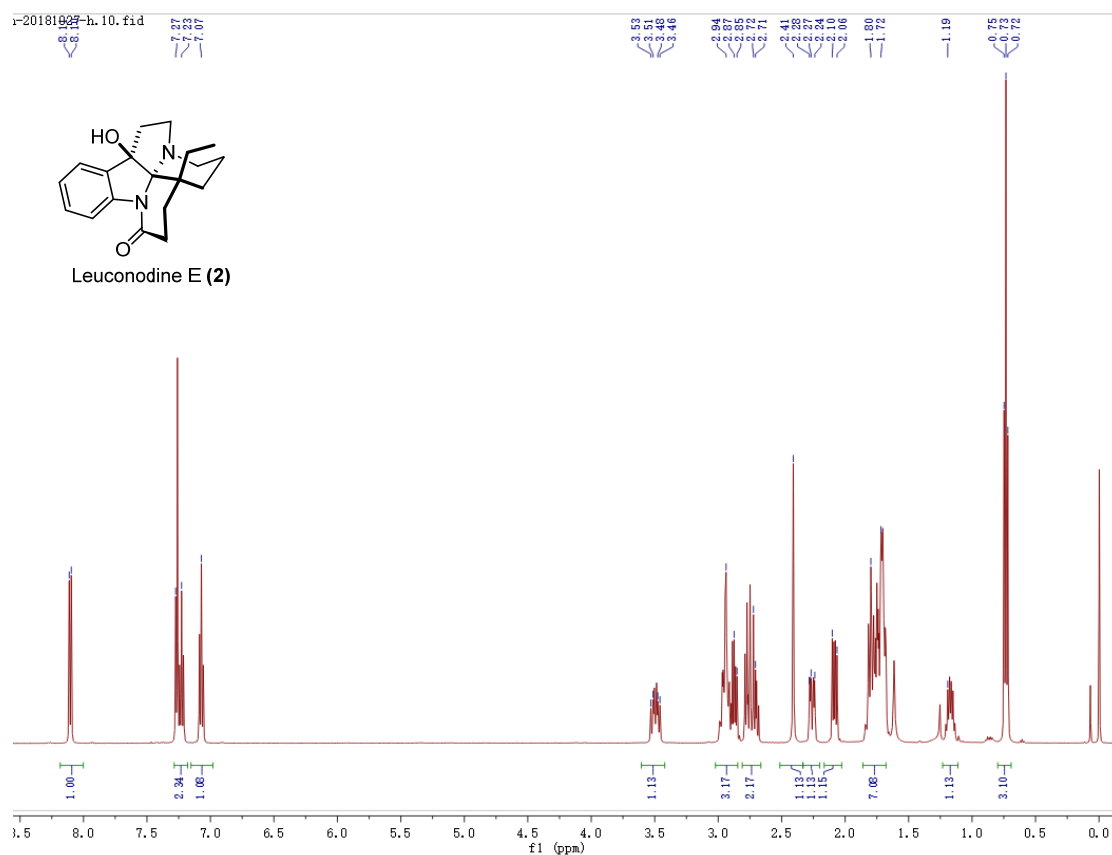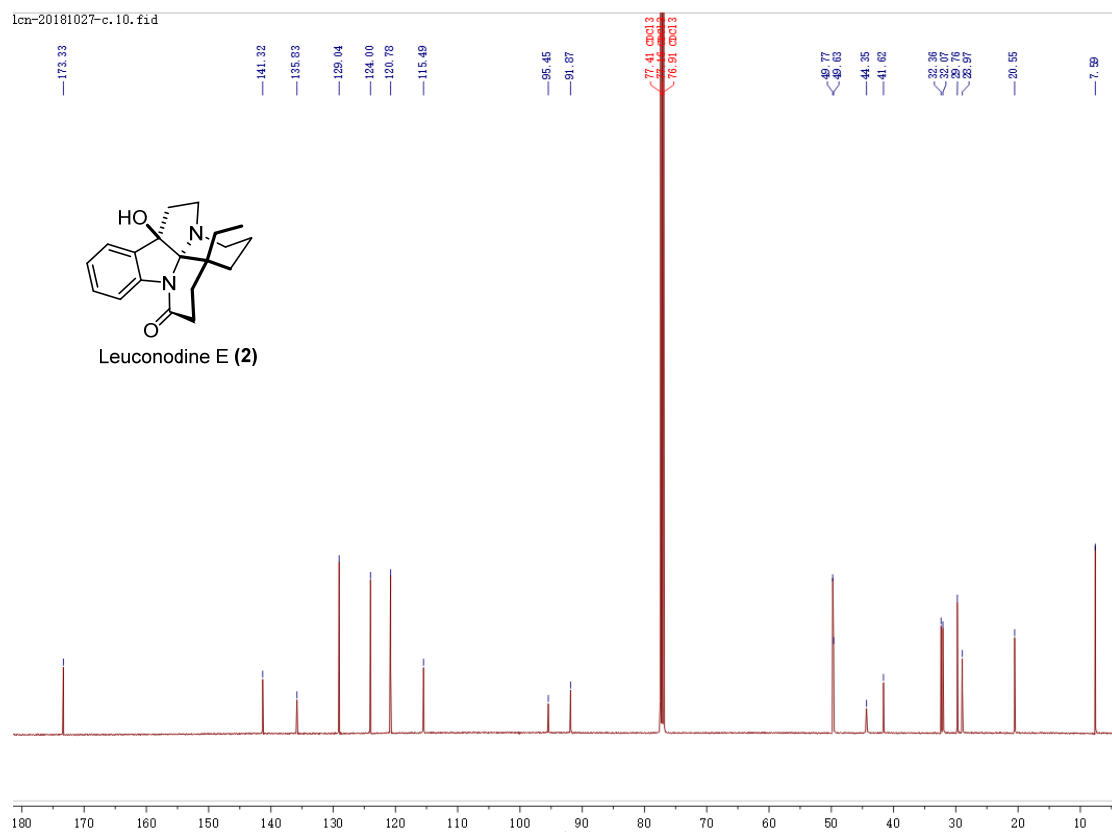

**Figure S12.**  $^1\text{H}$ - (upper) and  $^{13}\text{C}$ -NMR (lower) of compound leuconodine E

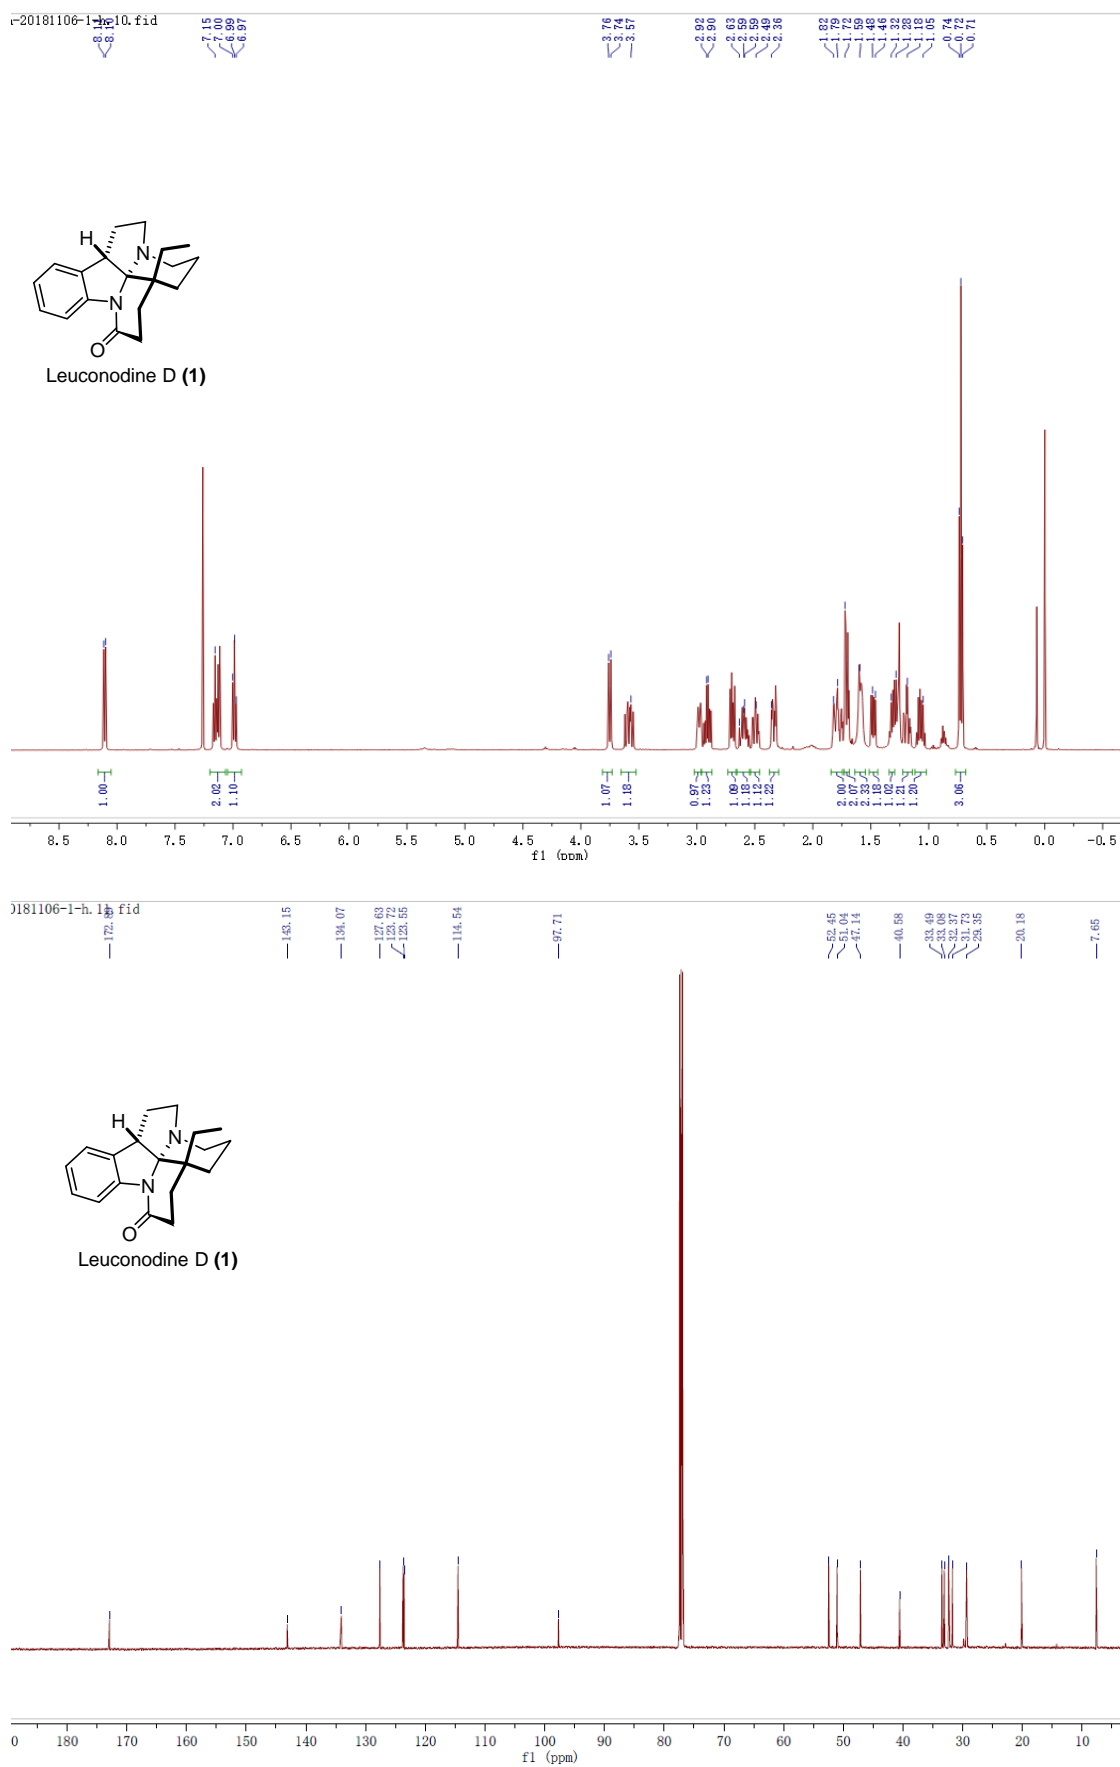

**Figure S13.**  $^1\text{H}$ - (upper) and  $^{13}\text{C}$ -NMR (lower) of compound leuconodine D

#### 4. References

- (1) Gan, C.-Y.; Low, Y.-Y.; Thomas, N. F.; Kam, T.-S. Rhazinilam-leuconolam-leuconoxine alkaloids from *leuconotis griffithii*. *J. Nat. Prod.* **2013**, *76*, 957.
- (2) Yang, Y.; Bai, Y.; Sun S.; Dai, M. Biosynthetically inspired divergent approach to monoterpene indole alkaloids: total synthesis of mersicarpine, leuconodines B and D, leuconoxine, melodinine E, leuconolam, and rhazinilam. *Org. Lett.* **2014**, *16*, 6216.
- (3) Zhang, J.; Han, F.-S. Pd-Catalyzed aerobic oxidative Heck cross-coupling for the straightforward construction of indole  $\delta$ -lactams. *iScience* **2019**, *17*, 256.
